# Supplementary material for: Deuterium-Reinforced Polyunsaturated Fatty Acids Prevent Diet-Induced Nonalcoholic Steatohepatitis by Reducing Oxidative Stress
Source: MDPI journal article supplement (doi:10.3390/medicina58060790), 2022-06-12
Supplement: s1 [file s1]

**Supplementary Tables:**

**Supplementary Table S1: The diets ingredient.**

| <b>Product #</b>                 | <b>519580</b>   |                | <b>New Diet</b> |                |
|----------------------------------|-----------------|----------------|-----------------|----------------|
| <b>Ingredient</b>                | <b>grams/kg</b> | <b>Kcal/kg</b> | <b>grams/kg</b> | <b>Kcal/kg</b> |
| L-Alanine                        | 3.5             | 14             | 3.5             | 14             |
| L-Arginine                       | 12.1            | 48             | 12.1            | 48             |
| L-Asparagine-H <sub>2</sub> O    | 6               | 24             | 6               | 24             |
| L-Aspartate                      | 3.5             | 14             | 3.5             | 14             |
| L-Cystine                        | 3.5             | 14             | 3.5             | 14             |
| L-Glutamine                      | 40              | 160            | 40              | 160            |
| Glycine                          | 23.3            | 93             | 23.3            | 93             |
| L-Histidine-HCl-H <sub>2</sub> O | 4.5             | 18             | 4.5             | 18             |
| L-Isoleucine                     | 8.2             | 33             | 8.2             | 33             |
| L-Leucine                        | 11.1            | 44             | 11.1            | 44             |
| L-Lysine-HCl                     | 18              | 72             | 18              | 72             |
| L-Phenylalanine                  | 7.5             | 30             | 7.5             | 30             |
| L-Proline                        | 3.5             | 14             | 3.5             | 14             |
| L-Serine                         | 3.5             | 14             | 3.5             | 14             |
| L-Threonine                      | 8.2             | 33             | 8.2             | 33             |
| L-Tryptophan                     | 1.8             | 7              | 1.8             | 7              |
| L-Tyrosine                       | 5               | 20             | 5               | 20             |
| L-Valine                         | 8.2             | 33             | 8.2             | 33             |
| Total amino acids                | 171.4           | 686            | 171.4           | 686            |
| Sucrose                          | 455.3           | 1821.2         | 455.3           | 1821.2         |
| Cornstarch                       | 150             | 600            | 150             | 600            |
| Dyetrose                         | 50              | 200            | 50              | 200            |
| Corn Oil                         | 150             | 600            | 150             | 600            |
| Cellulose                        | 30              | 0              | 30              | 0              |
| Mineral Mix #200000              | 35              | 0              | 35              | 0              |
| Sodium Bicarbonate               | 7.5             | 0              | 7.5             | 0              |
| Vitamin Mix #300050              | 10              | 40             | 10              | 40             |
| Choline Bitartrate               | 0               | 0              | 0               | 0              |
| L-Methionine                     | 0               | 0              | 0               | 0              |
| D-PUFA                           | 0               | 0              | 6.056           | 0              |
| Red Dye                          | 0.05            | 0              | 0.05            | 0              |
| Total                            | 1009.25         | 4247           | 1015.306        | 4247           |

**Supplementary Table S2: Primers used for RT-qPCR.**

| Primer           | Organism | 5'-Sequence-3'           |
|------------------|----------|--------------------------|
| $\beta$ -actin-F | mouse    | AGGCCCAGAGCAAGAGAGGTA    |
| $\beta$ -actin-R | mouse    | GGGGTGTGAAGGTCTCAAACA    |
| Nox1-F           | mouse    | GGAATTGCAGATGAGGAAGC     |
| Nox1-R           | mouse    | CCCAACCAGTACAGCCACTT     |
| Nox2-F           | mouse    | TTGGGTCAGCACTGGCTCTG     |
| Nox2-R           | mouse    | TGGCGGTGTGCAGTGCTATC     |
| P22phox-F        | mouse    | GTCCACCATGGAGCGATGTG     |
| P22phox-R        | mouse    | CAATGGCCAAGCAGACGGTC     |
| P47phox-F        | mouse    | GATGTTCCCCATTGAGGCCG     |
| P47phox-R        | mouse    | GTTTCAGGTCATCAGGCCGC     |
| P67phox-F        | mouse    | CTGGCTGAGGCCATCAGACT     |
| P67phox-R        | mouse    | AGGCCACTGCAGAGTGCTTG     |
| Cat-F            | mouse    | CCAGCGACCAGATGAAGCAG     |
| Cat-R            | mouse    | CCACTCTCTCAGGAATCCGC     |
| Sod1-F           | mouse    | CAGCATGGGTTCCACGTCCA     |
| Sod1-R           | mouse    | CACATTGGCCACACCGTCCT     |
| Gpx1-F           | mouse    | TTCGGACACCAGGAGAATGG     |
| Gpx1-R           | mouse    | TAAAGAGCGGGTGAGCCTTC     |
| Tnf- $\alpha$ -F | mouse    | AAGCCTGTAGCCACGTCGTA     |
| Tnf- $\alpha$ -R | mouse    | GGCACCAGTAGTTGGTTGTCTTTG |
| Il-1 $\beta$ -F  | mouse    | CTGAACTCAACTGTGAAATGCCA  |
| Il-1 $\beta$ -R  | mouse    | AAAGGTTTGAAGCAGCCCT      |
| Mcp1-F           | mouse    | AGGTCCCTGTCATGCTTCTGG    |
| Mcp1-R           | mouse    | CTGCTGCTGGTGATCCTCTTG    |
| Cd11c-F          | mouse    | AAAATCTCCAACCCATGCTG     |
| Cd11c-R          | mouse    | CACCACCAGGGTCTTCAAGT     |
| Ccl5-F           | mouse    | TGCCCTCACCATCATCCTCACT   |
| Ccl5-R           | mouse    | GGCGGTTCCCTCGAGTGACA     |
| Ccr2-F           | mouse    | ATTCTCCACACCCTG TTT      |
| Ccr2-R           | mouse    | GATTCCTGGAAGGTG          |
| Ccr5-F           | mouse    | ATTCTCCACACCCTGTTT       |
| Ccr5-R           | mouse    | CGTTTGACCATGTGT          |
| Cd206-F          | mouse    | CAAGGAAGGTTGGCATTGT      |
| Cd206-R          | mouse    | CCTTTCAGTCCTTTGCAAGC     |
| Mrc2-F           | mouse    | TACAGCTCCACGCTATGG       |
| Mrc2-R           | mouse    | CACTCTCCCAGTTGA          |
| Il-10-F          | mouse    | GCTCTTACTGACTGGCATGAG    |
| Il-10-R          | mouse    | CGCAGCTCTAGGAGCATGTG     |
| Arg1-F           | mouse    | CTCCAAGCCAAAGTCCTTAGAG   |
| Arg1-R           | mouse    | AGGAGCTGTCATTAGGGACATC   |
| $\alpha$ -Sma-F  | mouse    | TGTGCTGGACTCTGGAGA       |
| $\alpha$ -Sma-R  | mouse    | GAAGGAATAGCCACG          |

|                   |       |                         |
|-------------------|-------|-------------------------|
| Fn1-F             | mouse | TGCACGATGATATGGAGAGC    |
| Fn1-R             | mouse | TGGGTGTCACCTGACTGAAC    |
| $\beta$ -actin-F  | human | CACCATTGGCAATGAGCGGTTC  |
| $\beta$ -actin-R  | human | AGGTCTTTGCGGATGTCCACGT  |
| $\alpha$ -Sma-F   | human | TCATGGTCGGTATGGGTCAG    |
| $\alpha$ -Sma-R   | human | CGTTGTAGAAGGTGTGGTGC    |
| Coll $\alpha$ 1-F | human | GAGGGCAACAGCAGGTTCACTTA |
| Coll $\alpha$ 1-R | human | TCAGCACCACCGATGTCCA     |

---

Supplementary Figures

Supplementary Figure S1

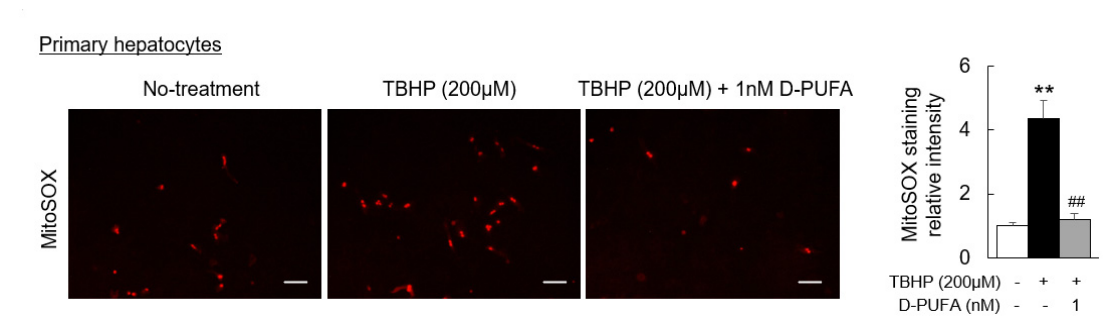

**Supplementary Figure S1.** D-PUFA decreases the MitoSOX in primary hepatocytes. Relative MitoSOX in primary hepatocytes. Scale bars = 100 μm. Data are presented as means ± SEM,  $n = 5-6$ . <sup>\*\*</sup>  $p < 0.01$  vs. no treatment cells, <sup>##</sup>  $p < 0.01$  vs. TBHP-treated cells. Significance was determined by one-way ANOVA. TBHP, tert-butyl hydroperoxide; D-PUFA, deuterium-reinforced polyunsaturated fatty acids.

## Supplementary Figure S2

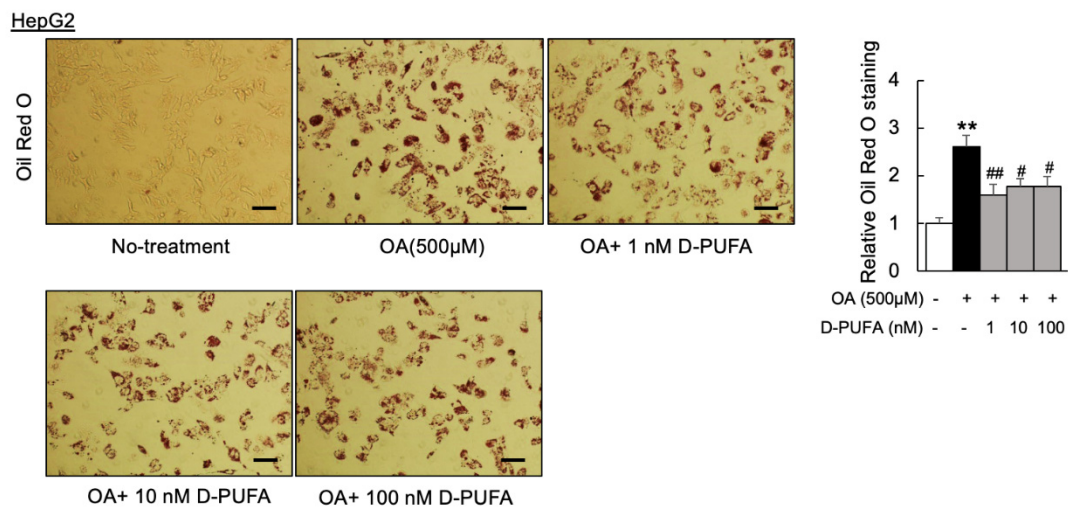

**Supplementary Figure S2.** D-PUFA reduces the lipid accumulation in hepatocytes. Oil Red O staining of HepG2 cells. Scale bars = 100 μm. Data are presented as means ± SEM,  $n = 5-6$ . \*\*  $p < 0.01$  vs. no treatment cells, #  $p < 0.05$ , ##  $p < 0.01$  vs. OA-stimulated condition. Significance was determined by one-way ANOVA. OA, sodium oleate; D-PUFA, deuterium-reinforced polyunsaturated fatty acids.

**Supplementary Figure S3**

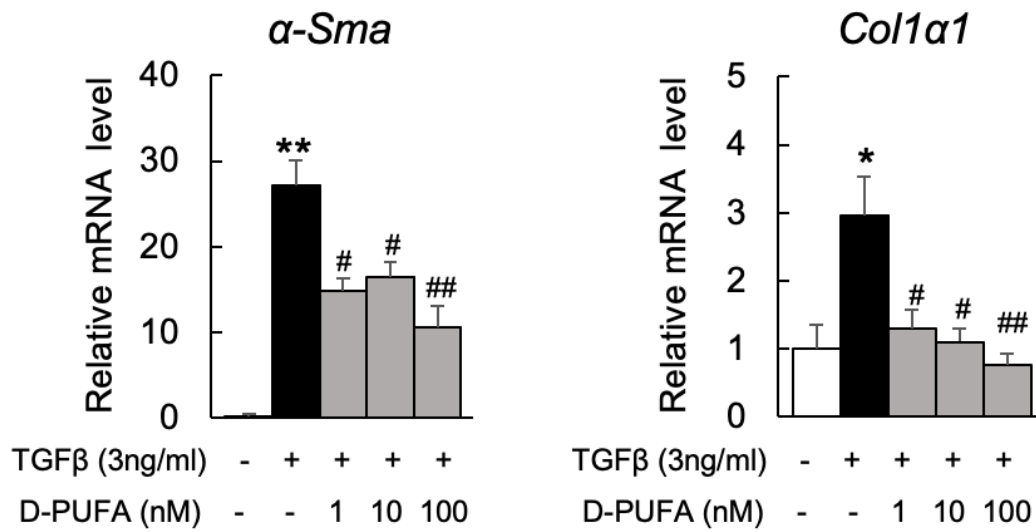

**Supplementary Figure S3.** D-PUFA attenuates HSC activity in LX2 stellate cells. mRNA expression of fibrosis genes in LX2 cells. Data are presented as means  $\pm$  SEM,  $n = 4-6$ . \*  $p < 0.05$ , \*\*  $p < 0.01$  vs. no treatment cells, #  $p < 0.05$ , ##  $p < 0.01$  vs. TGFβ-stimulated condition. Significance was determined by one-way ANOVA. TGFβ, transforming growth factor β; D-PUFA, deuterium-reinforced polyunsaturated fatty acids; α-Sma, α-smooth muscle actin; Col1α1, collagen type I α 1.
